# Supplementary material
Source: ML conference proceedings conference paper supplement (https://openaccess.thecvf.com/content/ICCV2023/html/Chiu_Better_May_Not_ICCV_2023_paper.html)
Supplement: Supplementary file 1 [file Chiu_Better_May_Not_ICCV_2023_supplemental.pdf]

## A. CIFAR10-B Statistics

| Classes    | Green | Gray | Blue | White | Black | Brown | Red | Others |
|------------|-------|------|------|-------|-------|-------|-----|--------|
| cat        | 171   | 130  | 137  | 57    | 84    | 299   | 63  | 59     |
| dog        | 271   | 90   | 124  | 39    | 81    | 297   | 58  | 40     |
| truck      | 121   | 180  | 278  | 187   | 24    | 177   | 2   | 31     |
| bird       | 453   | 58   | 179  | 32    | 32    | 237   | 0   | 9      |
| airplane   | 85    | 112  | 609  | 81    | 7     | 102   | 4   | 0      |
| ship       | 71    | 88   | 711  | 45    | 15    | 56    | 0   | 14     |
| frog       | 417   | 64   | 75   | 56    | 49    | 238   | 15  | 86     |
| horse      | 493   | 29   | 108  | 41    | 50    | 251   | 7   | 21     |
| deer       | 604   | 27   | 99   | 8     | 25    | 227   | 4   | 6      |
| automobile | 177   | 262  | 147  | 130   | 34    | 230   | 15  | 5      |

Table 5: **CIFAR10-B Statistics.** The number of instances that belongs to each background color from each class.

## B. More discussion on chosen baselines and comparison to AugMix & AugMax

We choose the DAs that are strong and commonly studied in recent works such as [48, 43, 44]. PyTorch’s official “SOTA” training method [44] also uses the combinations of our chosen baselines along with other perfected hyperparameters such as longer training; however, we isolated each baseline to measure the individual contribution of a single method. In addition, we compare with two recent works AugMix and AugMax, which are recent methods evaluated on plain Resnet18, and our generalization results are superior, as per reported in [45] (see Tab.6-*left*). AugMix and AugMax are not a single method but a combinations of different ones and were designed for other robustness purposes. Lastly, we want to re-iterate that generalization performance is not our main focus but an additional benefit when reducing the model bias toward specific colors.

## C. ImageNet-10

We labeled ImageNet-10 and found similar subgroup degradation aspect on ImageNet, and our method can still mitigate the issue using standard training procedure without fine-tuning (Tab.6-*right*); therefore, we believe FlowAug will work on high-resolution/larger datasets

## D. Selection of Color Groups

While labeling the datasets, we add one color only if it has a couple of images. This prevents having many colors with 0 images. For example, in CIFAR10, classes like “bird” and “ship” do not contain images with a red background, but it has some presence in other classes, so we added red as a color group.

## E. Generalization on CIFAR10-C and CIFAR100-C

Aside from generalization on *i.i.d.* data, we are interested in FlowAug’s capabilities to generalize to out-of-domain (OOD) data, which is another aspect of robustness. We use models of the last epoch from Table 2 to test on CIFAR10-C and CIFAR100-C. Although FlowAug does not explicitly add corruptions such as various kinds of blurring, contrast and so on to training data, we observe comparable performances (Fig. 8) with augmentation methods that have corruption effects, such as *MixUp*, and FlowAug is better than *Cutout* and *Cutmix* (+1.35% and +1.26%, respectively).

|        | CIFAR10      | CIFAR100     |           | Acc.         | MacroStd    | W-Std       |
|--------|--------------|--------------|-----------|--------------|-------------|-------------|
| AugMix | 95.79        | 78.23        | Standard  | 91.80        | 9.57        | 11.17       |
| AugMax | 95.76        | 78.96        | Autoaug   | 93.40        | 8.84        | 9.99        |
| Ours   | <b>96.58</b> | <b>79.99</b> | Ours-Alg1 | <b>94.80</b> | <b>8.39</b> | <b>9.96</b> |

Table 6: **Left: Accuracy of our FlowAug compared with AugMix & AugMax. Right: ImageNet-10 results.** Our FlowAug show superior results.

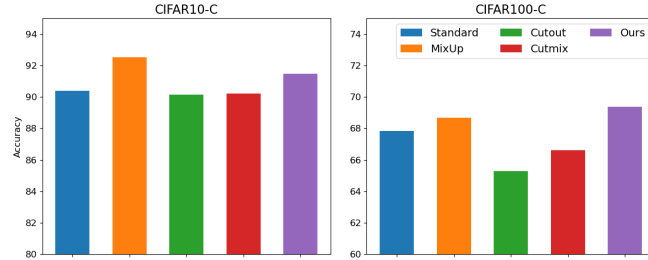

Figure 8: **CIFAR10-C and CIFAR100-C results (severity=1)**. FlowAug’s results are comparable with common DA methods that have corruption effects such as *Mixup*, even though FlowAug does not add corruptions to training. Note that *Mixup* (Figure 2(b)) produces a similar effect to blurrings.

### F. Switch Operation

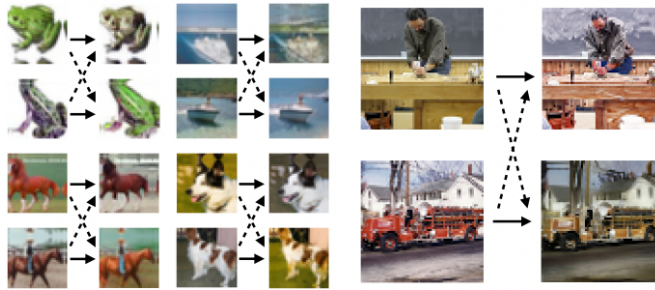

Figure 9: **Examples of switch operation on decoupled representations**. [28] can perform *switch* operations on global and local representations of images on various datasets (figure used with the author’s permission).

### G. Label Quality

The background color labels are labeled by a person with an experienced computer vision background for consistency and are verified twice. As a quality check, two people with strong technical backgrounds checked 500 random images. The rate of agreement is 91.8 percent, and 5.4 percent of images that did not agree in the first round agree with the labels we used for experiments after discussion. The disagreement rate is smaller than the average error rate in modern datasets [32]. We will release the dataset and welcome the community to update the background labels.

### H. An Additional Protected Attribute

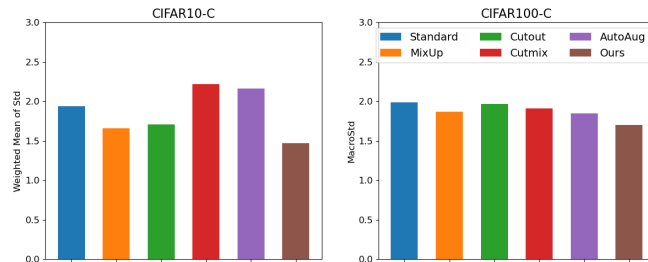

Figure 10: **Additional protected attribute on CIFAR10 and CIFAR100**.

In this work, we studied color as a bias, and we can also study another protected attribute in a hand-wavy fashion. For example on CIFAR10, we can group the ten classes into vehicles and animals and apply our MacroStd to measure sensitivity. A similar study can be conducted on CIFAR100 with its original 20 super-classes. On CIFAR10, since there are only two “super-classes” so we report the weighted average of the standard deviation of vehicle/animal group; on CIFAR100, we report our MacroStd across the 20 superclasses. The results are summarized in Fig. 10, and it shows FlowAug is again superior. We emphasize that this is a conceptual study on an additional protected attribute and is not within the scope of our work.

### I. CIFAR100-B Statistics

| Classes       | Green | Gray | Blue | White | Black | Brown | Red | Others |
|---------------|-------|------|------|-------|-------|-------|-----|--------|
| apple         | 23    | 6    | 9    | 40    | 11    | 11    | 0   | 0      |
| aquarium fish | 30    | 5    | 12   | 0     | 38    | 9     | 4   | 2      |
| baby          | 18    | 16   | 25   | 7     | 7     | 21    | 5   | 1      |
| bear          | 56    | 15   | 9    | 1     | 2     | 16    | 1   | 0      |
| beaver        | 36    | 8    | 18   | 8     | 6     | 24    | 0   | 0      |
| bed           | 8     | 21   | 7    | 18    | 3     | 42    | 0   | 1      |
| bee           | 24    | 8    | 10   | 6     | 4     | 33    | 8   | 7      |
| beetle        | 29    | 13   | 8    | 15    | 1     | 28    | 3   | 3      |
| bicycle       | 24    | 30   | 17   | 7     | 3     | 17    | 2   | 0      |
| bottle        | 10    | 24   | 9    | 17    | 7     | 28    | 4   | 1      |
| bowl          | 6     | 19   | 19   | 14    | 22    | 18    | 2   | 0      |
| boy           | 21    | 13   | 16   | 13    | 8     | 21    | 5   | 3      |
| bridge        | 11    | 9    | 67   | 5     | 5     | 2     | 1   | 0      |
| bus           | 14    | 19   | 23   | 18    | 8     | 14    | 0   | 4      |
| butterfly     | 53    | 12   | 3    | 7     | 4     | 17    | 2   | 2      |
| camel         | 31    | 10   | 25   | 3     | 9     | 19    | 2   | 1      |
| can           | 5     | 24   | 12   | 25    | 7     | 27    | 0   | 0      |
| castle        | 4     | 12   | 65   | 15    | 1     | 2     | 0   | 1      |
| caterpillar   | 63    | 6    | 7    | 0     | 6     | 15    | 2   | 1      |
| cattle        | 47    | 5    | 13   | 8     | 5     | 20    | 1   | 1      |
| chair         | 3     | 10   | 4    | 71    | 4     | 6     | 0   | 2      |
| chimpanzee    | 65    | 3    | 4    | 3     | 1     | 20    | 1   | 3      |
| clock         | 3     | 21   | 12   | 34    | 4     | 20    | 1   | 5      |
| cloud         | 0     | 2    | 80   | 2     | 8     | 2     | 2   | 4      |
| cockroach     | 2     | 19   | 13   | 44    | 1     | 14    | 5   | 2      |
| couch         | 5     | 14   | 19   | 24    | 6     | 27    | 3   | 2      |
| crab          | 9     | 23   | 16   | 16    | 15    | 16    | 3   | 2      |
| crocodile     | 39    | 13   | 11   | 2     | 5     | 28    | 2   | 0      |
| cup           | 9     | 27   | 18   | 17    | 14    | 11    | 1   | 3      |
| dinosaur      | 23    | 14   | 12   | 26    | 7     | 17    | 0   | 1      |
| dolphin       | 14    | 11   | 74   | 0     | 0     | 1     | 0   | 0      |
| elephant      | 48    | 6    | 17   | 3     | 3     | 19    | 2   | 2      |
| flatfish      | 15    | 14   | 34   | 13    | 6     | 12    | 6   | 0      |
| forest        | 4     | 7    | 22   | 7     | 0     | 11    | 3   | 46     |
| fox           | 32    | 11   | 19   | 1     | 7     | 26    | 2   | 2      |
| girl          | 15    | 11   | 15   | 10    | 13    | 26    | 7   | 3      |
| hamster       | 11    | 23   | 22   | 4     | 8     | 22    | 9   | 1      |
| house         | 20    | 4    | 42   | 20    | 3     | 7     | 0   | 4      |
| kangaroo      | 44    | 14   | 4    | 2     | 3     | 31    | 1   | 1      |
| keyboard      | 8     | 15   | 23   | 8     | 5     | 23    | 3   | 15     |
| lamp          | 5     | 20   | 23   | 14    | 12    | 20    | 5   | 1      |
| lawn`mower    | 32    | 6    | 6    | 45    | 2     | 9     | 0   | 0      |
| leopard       | 31    | 14   | 20   | 1     | 8     | 22    | 1   | 3      |
| lion          | 36    | 4    | 19   | 1     | 3     | 31    | 3   | 3      |
| lizard        | 13    | 14   | 21   | 5     | 8     | 30    | 5   | 4      |
| lobster       | 14    | 12   | 18   | 17    | 11    | 15    | 6   | 7      |
| man           | 15    | 19   | 14   | 9     | 18    | 24    | 1   | 0      |
| maple`tree    | 11    | 6    | 48   | 29    | 2     | 4     | 0   | 0      |

Table 7: **CIFAR100-B Statistics (part 1)**. The number of instances that belongs to each background color from each class.

| Classes      | Green | Gray | Blue | White | Black | Brown | Red | Others |
|--------------|-------|------|------|-------|-------|-------|-----|--------|
| motorcycle   | 11    | 28   | 10   | 30    | 2     | 16    | 3   | 0      |
| mountain     | 0     | 7    | 83   | 6     | 1     | 1     | 2   | 0      |
| mouse        | 15    | 13   | 13   | 12    | 6     | 34    | 1   | 6      |
| mushroom     | 57    | 9    | 5    | 3     | 7     | 19    | 0   | 0      |
| oak`tree     | 6     | 2    | 72   | 15    | 1     | 4     | 0   | 0      |
| orange       | 13    | 11   | 17   | 20    | 20    | 6     | 3   | 10     |
| orchid       | 35    | 4    | 7    | 4     | 35    | 9     | 1   | 5      |
| otter        | 28    | 14   | 27   | 3     | 5     | 22    | 1   | 0      |
| palm`tree    | 3     | 7    | 62   | 13    | 5     | 5     | 0   | 5      |
| pear         | 19    | 13   | 10   | 28    | 7     | 20    | 0   | 3      |
| pickup`truck | 31    | 27   | 16   | 6     | 5     | 14    | 0   | 1      |
| pine`tree    | 7     | 11   | 61   | 13    | 1     | 7     | 0   | 0      |
| plain        | 0     | 13   | 70   | 14    | 0     | 3     | 0   | 0      |
| plate        | 3     | 22   | 15   | 26    | 17    | 13    | 2   | 2      |
| poppy        | 57    | 4    | 7    | 4     | 14    | 4     | 2   | 8      |
| porcupine    | 51    | 11   | 8    | 1     | 11    | 17    | 0   | 1      |
| possum       | 27    | 19   | 10   | 1     | 16    | 22    | 2   | 3      |
| rabbit       | 34    | 6    | 12   | 2     | 16    | 28    | 2   | 0      |
| raccoon      | 30    | 6    | 14   | 5     | 21    | 23    | 1   | 0      |
| ray          | 23    | 11   | 49   | 3     | 6     | 8     | 0   | 0      |
| road         | 47    | 7    | 34   | 2     | 2     | 7     | 1   | 0      |
| rocket       | 7     | 14   | 66   | 5     | 4     | 4     | 0   | 0      |
| rose         | 54    | 3    | 10   | 9     | 11    | 5     | 1   | 7      |
| sea          | 2     | 6    | 74   | 2     | 0     | 12    | 1   | 3      |
| seal         | 17    | 14   | 43   | 4     | 6     | 12    | 1   | 3      |
| shark        | 12    | 3    | 68   | 1     | 13    | 2     | 1   | 0      |
| shrew        | 30    | 8    | 17   | 5     | 5     | 31    | 3   | 1      |
| skunk        | 42    | 13   | 5    | 3     | 6     | 30    | 1   | 0      |
| skyscraper   | 1     | 5    | 80   | 9     | 2     | 2     | 0   | 1      |
| snail        | 45    | 7    | 12   | 3     | 5     | 26    | 1   | 1      |
| snake        | 21    | 15   | 13   | 7     | 4     | 30    | 7   | 3      |
| spider       | 37    | 18   | 15   | 2     | 9     | 11    | 7   | 1      |
| squirrel     | 36    | 6    | 14   | 5     | 8     | 30    | 0   | 1      |
| streetcar    | 22    | 10   | 32   | 11    | 4     | 13    | 7   | 1      |
| sunflower    | 44    | 1    | 26   | 9     | 7     | 3     | 2   | 8      |
| sweet`pepper | 15    | 7    | 9    | 27    | 14    | 14    | 6   | 8      |
| table        | 10    | 17   | 18   | 17    | 7     | 29    | 2   | 0      |
| tank         | 16    | 13   | 30   | 17    | 1     | 23    | 0   | 0      |
| telephone    | 5     | 11   | 5    | 59    | 4     | 13    | 3   | 0      |
| television   | 4     | 24   | 10   | 26    | 10    | 21    | 2   | 3      |
| tiger        | 45    | 3    | 14   | 8     | 9     | 16    | 0   | 5      |
| tractor      | 33    | 8    | 34   | 10    | 1     | 14    | 0   | 0      |
| train        | 18    | 16   | 42   | 13    | 4     | 7     | 0   | 0      |
| trout        | 20    | 6    | 15   | 28    | 14    | 16    | 1   | 0      |
| tulip        | 53    | 2    | 11   | 4     | 16    | 13    | 1   | 0      |
| turtle       | 14    | 9    | 37   | 10    | 6     | 22    | 2   | 0      |
| wardrobe     | 10    | 22   | 10   | 20    | 9     | 20    | 2   | 7      |
| whale        | 1     | 4    | 85   | 7     | 0     | 3     | 0   | 0      |
| willow`tree  | 13    | 3    | 43   | 26    | 2     | 5     | 0   | 8      |
| wolf         | 17    | 10   | 22   | 5     | 22    | 18    | 6   | 0      |
| woman        | 12    | 21   | 16   | 19    | 7     | 15    | 8   | 2      |
| worm         | 13    | 13   | 26   | 8     | 17    | 15    | 7   | 1      |

Table 8: **CIFAR100-B Statistics (part 2)**. The number of instances that belongs to each background color from each class.
